# Supplementary material
Source: Elsevier journal article supplement (https://www.sciencedirect.com/science/article/pii/S1413355521000848)
Supplement: mmc1 [file S1413355521000848:mmc1.pdf]

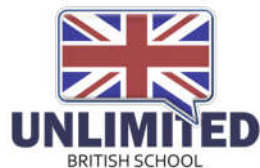

(43) 3334-0114 | (43) 8418-5285  
WWW.ENGLISHUNLIMITEDSCHOOL.COM  
LONDRINA | PR

I, Robin Hambly, of Rua Jose Andreolli, 14, Londrina, Paraná, Brazil, being an English native speaker, with over 11 years of professional experience in proofreading scientific manuscripts, hereby confirm that I have reviewed the document entitled

### **Changes in movement behaviors and back pain during COVID-19 pandemic**

in its entirety, and believe it to be of publication quality.

Dated 1<sup>st</sup> March 2021

---

Robin Hambly
